# Supplementary material
Source: publisher figshare collection journal article supplement (https://acs.figshare.com/ndownloader/files/4027603)
Supplement: Supplementary file 1 [file 4027603]

Excited-State Tautomerization of 7-Azaindole in Non-polar Solution: A Theoretical Study  
Based on Liquid-Phase Potential Surfaces of Mean Force

*Hua Fang and Yongho Kim\**

Department of Applied Chemistry, Kyung Hee University, 1 Seochun-Dong, Giheung-Gu,  
Yongin-Si, Gyeonggi-Do, 446-701, Republic of Korea

Email: yhkim@khu.ac.kr

**Table S1.** Excited-state dipole moments  $\mu$ (Debye) of reactant, TS, and product for 7AI-CH<sub>3</sub>OH and 7AI-C<sub>2</sub>H<sub>5</sub>OH complexes at the CASSCF(10,9) level in the gas phase and in heptane with the IEFPCM and SMD models.

|                                      |        | R(L <sub>b</sub> ) | TS(L <sub>a</sub> ) | P    |
|--------------------------------------|--------|--------------------|---------------------|------|
| 7AI-CH <sub>3</sub> OH               | GAS    | 1.55               | 4.87                | 1.75 |
|                                      | IEFPCM | 1.83               | 5.84                | 1.95 |
|                                      | SMD    | 1.92               | 5.95                | 2.03 |
| 7AI-C <sub>2</sub> H <sub>5</sub> OH | GAS    | 1.46               | 5.16                | 1.66 |
|                                      | IEFPCM | 1.72               | 6.18                | 1.86 |
|                                      | SMD    | 1.79               | 6.37                | 1.88 |

**Table S2** Alcohol-dependent ESDPT rate constants,  $k_{pt}$  (ps<sup>-1</sup>) in n-heptane, and Kamlet-Taft acidity ( $\alpha$ ) and basicity ( $\beta$ ) values for methanol and ethanol. <sup>a</sup>

|                                      | $k_{pt}$ (ps <sup>-1</sup> ) | $\alpha$ | $\beta$ |
|--------------------------------------|------------------------------|----------|---------|
| 7AI-CH <sub>3</sub> OH               | (88) <sup>-1</sup>           | 0.93     | 0.62    |
| 7AI-C <sub>2</sub> H <sub>5</sub> OH | (95) <sup>-1</sup>           | 0.83     | 0.77    |

a) Ref. 1. Acidity ( $\alpha$ ) and basicity ( $\beta$ ) constants for methanol and ethanol measured from the bulk alcohol, since the values of the monomeric alcohol show similar trends to those of the bulk alcohol.

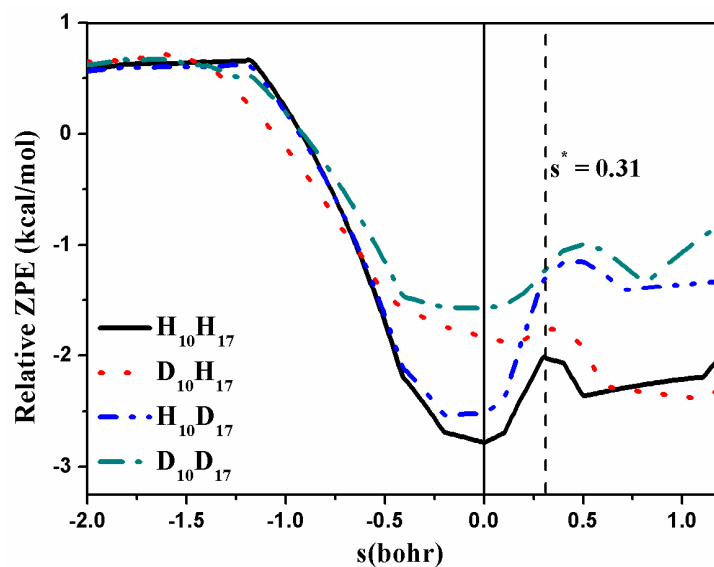

**Figure S1.** Relative zero-point energies in terms of the corresponding reactant values along the MEP of isotopically substituted 7Al-CH<sub>3</sub>OH complexes calculated at the MRPT2//SMD/CASSCF(10,9) /6-31G(d,p) level in heptane. The vertical solid and dashed lines represent conventional TSs at the CASSCF and MRPT2 levels, respectively.

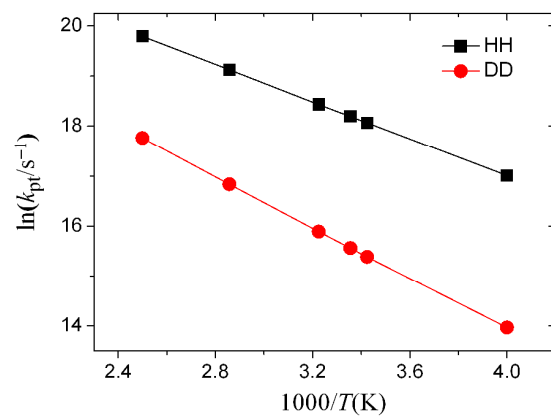

**Figure S2.** Arrhenius plots of HH and DD rate constants for 7Al-CH<sub>3</sub>OH complexes in heptane

1. Kwon, O. H.; Lee, Y. S.; Park, H. J.; Kim, Y. H.; Jang, D. J. *Angew. Chem. Int. Ed.* **2004**, *43*, 5792-5796.
